25 **Abstract**

26 In temperate forest ecosystems, the role of large herbivores in litter decomposition, a key nutrient  
27 cycling process, is unresolved. Herbivores may first modify litter abundance by affecting plant cover.  
28 They may also modify the decomposition process by changing litter quality and altering decomposers'  
29 ability by changing soil abiotic properties and/or decomposer communities. Using two litterbag  
30 transplantation experiments in the quasi-experimental situation resulting from the introduction of  
31 Sitka black-tailed deer to the forests of Haida Gwaii (Canada), we disentangle the relative importance  
32 of the latter modifications on litter decomposition. We demonstrate that deer strongly reduce carbon  
33 (C) and nitrogen (N) loss, a 21 and 38 % decrease respectively, mainly by altering plant community  
34 composition. We reveal other ecosystem changes induced by deer through feces deposition, abiotic  
35 soil modification or decomposer community changes that affect decomposition processes, but are  
36 outweighed by deer top-down control on vegetation quality. Thus, the large increase in deer  
37 populations in temperate forests worldwide may be considered an important factor modifying global  
38 C and N cycling.

39

40

41

42

43

44

45

46

47

## 48 **Introduction**

### 49 *Large herbivores and the functioning of temperate forests*

50 Temperate forests, dominated either by coniferous or by broadleaved trees, cover approximately 12%  
51 of the Earth's surface (Olson et al., 2001) and include some of the most threatened forest ecoregions  
52 (e.g. temperate rainforests, (DellaSala, 2011). Until recently, the role of large herbivores in nutrient  
53 cycling processes in these forests has been relatively neglected (Tanentzap & Coomes, 2012). This may  
54 be partly because forest ungulates were largely absent from European and many North American  
55 forests as a result of hunting and/or unfavorable habitat availability (McShea, Underwood, & Rappole,  
56 1997; Apollonio, Andersen, & Putman, 2010). The dramatic rebound in herbivore populations in the  
57 second part of the 20<sup>th</sup> century, following changes in hunting regulations and in land-use (farm  
58 abandonment and reversion to forests), and the extirpation of their natural predators, brought large  
59 forest ungulates back to the forefront of ecological thinking (Terborgh & Estes, 2013). The initial  
60 emphasis of research was on the consequences of herbivore recovery on forest vegetation, beginning  
61 with impacts on tree regeneration and growth (Gill, 1992), and, more recently, on aboveground  
62 understory community functioning (Horsley, Stout, & DeCalesta, 2003; Royo, Collins, Adams,  
63 Kirschbaum, & Carson, 2010), including cascading effects on different segments of the trophic network  
64 [invertebrates, birds (e.g. Chollet & Martin, 2013; Foster, Barton, & Lindenmayer, 2014)].

65 While our grasp of the mechanisms of herbivore effects on forest aboveground communities has  
66 dramatically improved recently, the critical repercussions on belowground patterns and processes are  
67 still only insufficiently understood (Bardgett & Wardle, 2003; Hobbie & Villéger, 2015). Belowground  
68 effects will be partly mediated by the effects large herbivores have on litter decomposition. From an  
69 ecosystem perspective, litter decomposition plays a pivotal role at the interface between aboveground  
70 primary production and belowground processes (Chapin, Matson, & Vitousek, 2011). In temperate  
71 forest ecosystems, contrary to grasslands or boreal forest, there are still few studies on how large  
72 forest herbivores affect different aspects of litter decomposition.

### 73 *Large forest herbivores and litter decomposition*

74 Large herbivores may modify belowground processes by affecting two of the main controls on  
75 decomposition: litter quality and decomposers ability (Prescott, 2010). Through plant removal,  
76 combined with selective foraging, large herbivores modify plant community composition, plant  
77 stoichiometry, as well as the relative contribution of canopy and understory vegetation to litter  
78 composition (Côté, Rooney, Tremblay, Dussault, & Waller, 2004). These changes in plant litter quality  
79 and quantity will, consequently, modify decomposition processes and nutrient cycling (Bardgett &  
80 Wardle, 2003). In addition, large herbivores also produce high quality litter through dung and urine  
81 deposition that may enhance microbial activity, and thus, decomposition (Sitters et al., 2017).  
82 Independently from litter quality, recent evidence indicates that decomposition occurs more rapidly  
83 when litter is placed under the plant species from which it originated (Gholz, Wedin, Smitherman,  
84 Harmon, & Parton, 2000; Ayres et al., 2009; Austin, Vivanco, González-Arzac, & Pérez, 2014). This  
85 “home-field advantage” due to decomposer specialization may partly compensate the  
86 aforementioned changes in decomposition caused by large herbivores, but studies explicitly testing  
87 this hypothesis are scarce, and provide contrasting results (see Olofsson & Oksanen, 2002; Penner &  
88 Frank, 2018).

89 The second potential way large herbivores modify belowground processes is through alteration of  
90 decomposers ability. This could happen through change in soil properties, such as compaction, pH,  
91 moisture, that affect microclimates and consequently decomposition rates (Gass & Binkley, 2011; Z.  
92 Wang et al., 2018). In addition, large herbivores may also modify the development and functioning of  
93 decomposer communities [soil fauna (Andriuzzi & Wall, 2017) and microorganisms (Cline, Zak,  
94 Upchurch, Freedman, & Peschel, 2017; Eldridge et al., 2017)], changing the rate of litter decomposition  
95 (Handa et al., 2014).

96 There is recognition of the multiplicity of pathways through which large herbivores may affect litter  
97 decomposition (see Bardgett & Wardle (2003) for a conceptual model), but our knowledge is mainly  
98 based on the independent study of each pathway, which has led to apparent contradictions in

99 observed results. To better identify the mechanisms behind the effect of large herbivores on litter  
100 decomposition we designed a study that combined approaches able to disentangle the relative effects  
101 of multiple pathways on the process.

### 102 *A unique quasi-experimental study site*

103 Our long term study of how deer introduced to the archipelago of Haida Gwaii (British Columbia,  
104 Canada) affected the ecology of its forests (Table S1), provided a unique opportunity and critical  
105 background knowledge for an integrated study of large herbivore effects on litter decomposition. Sitka  
106 black-tailed deer (*Odocoileus odocoileus sitkensis*), native to coastal British Columbia's temperate  
107 rainforests, were introduced to Haida Gwaii from the nearby mainland in the late 19<sup>th</sup> century  
108 (Golumbia, Bland, Morre, & Bartier, 2008). Deer colonized most, but not all, islands, resulting in a  
109 quasi-experimental situation with islands colonized by deer early on, and a limited number of small  
110 isolated forested islands never colonized. The occurrence of reference islands without deer made it  
111 possible to demonstrate that, on all islands where deer were present, deer herbivory was the main  
112 factor structuring plant, invertebrate and songbird communities, overwhelming other biotic or abiotic  
113 factors (i.e. islands areas, soil and micro-habitats diversity (Chollet, Baltzinger, Ostermann, Saint-  
114 André, & Martin, 2013; Gaston, Stockton, & Smith, 2006; Martin & Baltzinger, 2002; Martin, Stockton,  
115 Allombert, & Gaston, 2010) and Table S1). In addition, the monitoring of islands subject to recurrent  
116 experimental culls allowed us to document the potential for recovery of the aboveground vegetation  
117 and songbirds that followed the severe reduction in deer herbivory (Chollet et al., 2016).

118 We made use of this exceptional situation to assess via two litterbag experiments how deer affected  
119 litter decomposition, and the mechanisms involved. First, we assessed the effect of deer presence on  
120 litter decomposition at the community scale. We used a reciprocal translocation of litterbags  
121 containing litters representative of three herbivory levels: strong on sites with deer, absent on sites  
122 without deer, and intermediate on sites with deer population subject to recent recurrent culls. The  
123 objective was to discriminate among the effects deer have on litter decomposition, either through

124 their impact on litter quality or through their effect on decomposers' ability (including effects on soil  
125 properties and decomposer community composition), through an approach that explicitly includes  
126 home field advantage. Second, we added deer feces in a set of litterbags to assess how the deposition  
127 of high quality litter in the form of feces, affected the rate of litter decomposition.

## 128 **Material and Method**

### 129 *Study site and vegetation sampling*

130 Haida Gwaii is characterized by a humid temperate-oceanic climate, with mean annual temperature of  
131 8.5°C and precipitation which varies greatly from 1,350 mm on the east coast to 7,000 mm on the west  
132 coast (Banner et al., 2014). The archipelago is covered by temperate rainforest dominated at low  
133 elevation by western hemlock (*Tsuga heterophylla*), western redcedar (*Thuja plicata*), and Sitka spruce  
134 (*Picea sitchensis*). The location of our study sites are in the coastal western hemlock wet hypermaritime  
135 BEC subzone, CWHwh1, which occupies 49% the archipelago, and ranges from sea-level to 350m in  
136 elevation (Banner et al., 2014). Soil bedrock geology is volcanic and sedimentary, together with  
137 intrusions of granitic rock (Sutherland Brown, 1968).

138 We selected three islands in Laskeek Bay (52°53'12"N, 131°35'20"W, Figure S1 in Supporting  
139 Information). We selected sites with similar parent material and representative of the patterns of deer  
140 impacts we documented at the scale of the archipelago (Chollet, Bergman, Gaston, & Martin, 2015;  
141 Martin et al., 2010; see Table S1 for a synthesis of previous studies). Low Island, 9.6 ha, has never been  
142 colonized by deer. Louise Island, 25,000 ha, was colonized by deer for over 80 years ago (Vila, Torre,  
143 Guibal, & Martin, 2004) and has a current deer density estimated at 30 deer / km<sup>2</sup>. Reef Island, 249 ha,  
144 was also colonized by deer more than 80 years ago, but its deer population has been regularly culled  
145 between 1997 and 2010. Reef Island has a current deer population density estimated at about 15 deer  
146 / km<sup>2</sup> and a partially recovered understory vegetation (Chollet et al., 2016). Low, Reef and Louise  
147 Islands therefore represent three distinct deer herbivory treatments: absence of current and historic  
148 browsing pressure, intermediate browsing pressure and strong browsing pressure, respectively. Our

149 rigorous selection of sites with similar bedrock and similar forest types but representative of all three  
150 browsing regimes prevented us to control also for island size. To take this into account we selected all  
151 sampling plots in the coastal sites on all islands. On each island we established and sampled 15  
152 vegetation plots of 10 m x 10 m, leading to a total of 45 plots. Adjacent plots were separated by at  
153 least 100 m. In each plot we estimated the percentage cover of vascular plants and bryophytes in three  
154 strata, ground, understory and canopy, using the Londo scale (Londo, 1976).

#### 155 *Litter and feces collection, litter bag construction and translocation experiment*

156 We measured litter decomposition rates using the litter bag method. To obtain our litter samples, we  
157 collected summer senescent leaves from 33 plants species on the three islands (representing the three  
158 distinct deer herbivory levels). We dried these litter samples at 30°C for a week before using them. We  
159 collected fresh deer feces from another deer inhabited island in Laskeek Bay (East Limestone, 48 ha)  
160 in order to standardize feces quality. For litter decomposition we used 15 cm \* 15 cm bags made of  
161 polypropylene mesh with two different mesh sizes. We used litterbags with a 0.2 mm mesh size to  
162 target the decomposition solely due to soil microfauna and microorganisms. We used litterbags with  
163 a 3.7 x 4.45 mm mesh size to assess litter the additional effect of mesofauna and macrofauna on  
164 decomposition.

165 We developed two complementary experiments in order to study the various mechanisms by which  
166 deer could affect the decomposition process.

167 Experiment 1. To investigate the decomposition of the plant community litter present in each given  
168 plot, we collected litter from all plant species covering more than 5% of the plot area. The objective  
169 was to produce litterbags for each plot that contained plant material in the same proportion as in the  
170 plot. We fixed total mass of litter per litterbag at 4g. Hence, the mass of each plant species litter was  
171 calculated according to its relative abundance in the plot. For each plot we made three identical  
172 litterbags for each of the two mesh-sizes. For each mesh size we placed one litterbag on the plot the  
173 litter came from (“Home”). We placed the two remaining bags per mesh-size on the plots on the two

174 other islands (“Away”). This translocation allowed us to independently test for the effects of home  
175 field advantage, of decomposers ability (soil properties and decomposer community composition), and  
176 of litter quality on litter decomposition (Figure S1). Litter bags were numbered with aluminum tags  
177 and placed randomly on the surface of the forest floor on each plot, and held in place using U pins at  
178 each corner of the bag.

179 Experiment 2. To investigate the influence of deer feces on litter decomposition, we placed on each of  
180 the 45 plots a litterbag containing 2 g of deer feces and 2 g of a standardized litter (litter from one of  
181 the dominant tree species on all islands, *P. sitchensis*) for each of the two mesh-size bags. As controls,  
182 we used a litterbag only filled with 5g of deer feces and a litter bag exclusively filled with 2 g of *P.*  
183 *sitchensis* litter, again using the two mesh-size bags. We placed control litter bags on each plot. To  
184 avoid any biases from potential inter-treatment differences in spruce litter quality, we used a mix of *P.*  
185 *sitchensis* litter collected from the three islands for this set of litterbags.

186 Thus we placed a total of 12 litterbags ([3 community compositions + 1 feces + 1 *P. sitchensis* + 1 mix  
187 of feces and *P. sitchensis*] \* 2 mesh size) at each plot, representing a total of 540 litterbags (12 bags \*  
188 45 plots). We fixed the litterbags at soil surface in July 2017 and collected them in July 2018, one year  
189 later. After collection we dried the contents of the litterbags at 70°C for 48h prior to weighing the  
190 contents and then performing chemical analyses.

### 191 *Structural and chemical analyses*

192 We measured initial C and N contents of dried litter from eight individuals of each plant species  
193 (vascular and bryophytes) from each island (with varying deer herbivory). Additionally, we measured  
194 initial C and N contents of eight deer pellet groups that were previously dried at 70°C for 48h. C and N  
195 contents were determined with an Elementar Vario El Cube Analyzer (Elementar, Langenselbold,  
196 Germany) using 3.5 mg of ground material. Based on these values and on the relative proportion of  
197 each litter in the bags, we calculated initial C and N content for each litterbag.

198 We further calculated carbon and nitrogen loss after one year in the small mesh litterbags only. At the  
199 end of the experiment we finely ground dried litter from the small mesh litterbags, and measured C



200 and N content. We calculated carbon and nitrogen loss by subtracting the amount of carbon and  
201 nitrogen content after one year of decomposition from the initial amount.

202 We measured soil bulk density at the surface of the soil with five replicate measures per plot. For this,  
203 we collected soil with a 5.4 cm depth x 4.1 cm diameter (71.29cm<sup>3</sup>) copper core hammered into the  
204 soil using a mallet. We took care to not change the structure of the soil while sampling. We removed  
205 any coarse woody debris from core samples and subtracted their volume from the volume of the core.  
206 We then dried soil at 105°C for 24h. We used data on soil pH, C:N and organic horizon depth collected  
207 from another study located on the same islands (Maillard et al. unpublished data) in different plots  
208 (but located in the same area). The data was collected from five plots on Low Island, five plots on  
209 Louise Island and six plots on Reef Island. Soil organic horizon depth was measured from a soil pit dug  
210 within each plot. Soil was sampled within the plots with a 2.5 cm diameter x 30 cm depth core.  
211 Approximately 100 samples per plot were composited and sieved with a 5 mm sieve to ensure  
212 homogenization. We measured soil pH in a 0.01 M CaCl<sub>2</sub> solution using a 1:10 ratio (air dried soil:  
213 solution). Soil C:N ratio was determined from 3 mg of freeze-dried and ground soil using an Elementar  
214 Vario El Cube Analyzer.

### 215 *Statistical analysis*

216 In order to evaluate the effect of deer herbivory on plant community composition we used  
217 Correspondence Analysis. In addition we calculated the Community Weighted Mean (CWM) of the  
218 litter C:N ratio at each plot using the formula  $CWM_i = \sum_1^j (C_j \times p_j) / \sum_1^j (N_j \times p_j)$   
219 with  $i$  representing the plot,  $j$  the plant species on this plot,  $C_j$  and  $N_j$  the C and N content of the  
220 corresponding litter, and  $p_j$  the relative abundance of the corresponding plant species on the plot.  
221 We compared litter CWM C:N ratio, soil bulk density, soil pH, soil C:N ratio and organic horizon depth  
222 between the three islands using one way ANOVA with permutation tests.

223 *Analyses of decomposition experiment 1 (plant community).* We used two way ANOVA to  
224 compare mass loss, carbon loss and nitrogen loss between litterbags with the three litter sources  
225 (island with no, intermediate or strong deer herbivory) and the three decomposition place (island with

226 no, intermediate or strong deer herbivory). To disentangle the relative importance of the two main  
227 ways deer may modify C and N decomposition, we used the Decomposer Ability Regression Test  
228 proposed by (Keiser, Keiser, Strickland, & Bradford, 2014) using SAS 9.4 (SAS Institute, Cary, NC). This  
229 method statistically discriminates among effects of litter quality (i.e. how rapidly a litter is decomposed  
230 regardless of decomposition site), ability (i.e. how rapidly a litter is decomposed at one site regardless  
231 of litter quality [includes the effect of soil abiotic conditions and the capacity of decomposer  
232 communities]) and Home Field Advantage (i.e. the acceleration of decomposition of litter when  
233 decomposing in the plot the litter comes from as a result of specialization of the decomposer  
234 community). Compared to the classically used Structural Equation Modeling (SEM), the Decomposer  
235 Ability Regression Test offers the additional possibility to explicitly test HFA and maximizes the  
236 information extracted from the litter transplant experiment (Keiser et al., 2014). To explore the  
237 reasons for differences in litter quality caused by deer we performed linear models between C or N  
238 loss and litter CWM C:N ratio.

239 *Analyses of decomposition experiment 2 (feces manipulation).* We used two way ANOVA to  
240 compare mass loss, C loss and N loss of *Picea sitchensis*, feces and combination of both.

241 For all analyses when homoscedasticity and normality of the distribution of the residues were not  
242 respected (i.e large mesh litterbags) we used ANOVA with permutation tests instead of classical  
243 ANOVA (ImPerm package, (Wheeler, 2010)).

244 We performed all statistical analyses (except Decomposer Ability Regression Test) in the R 3.4.1  
245 environment (R Core Team, 2017).

246

## 247 **Results**

### 248 *Deer modify aboveground and belowground characteristics*

249 The first axis of the Correspondence Analysis clearly discriminated the plant species composition and  
250 abundance in the plots according to deer browsing level (Fig. 1A). In the absence of deer, vegetation  
251 cover was higher and there was greater shrub diversity. The vegetation on plots with strong deer

252 herbivory was characterized by a high cover and diversity of bryophytes (Fig. 1A). Plots under  
 253 intermediate deer herbivory showed intermediate plant species diversity and cover. We found no  
 254 significant difference in the C:N ratio of the plant litter among deer herbivory treatments (Fig. 1B, p-  
 255 value = 0.2).  
 256 Soil bulk density was significantly higher on plots from islands with deer (Fig. 1C, p-value < 2.2e<sup>-16</sup>). Soil  
 257 pH and depth of the organic horizon measured in the plots significantly decreased with increasing deer  
 258 browsing pressure (Fig. 1D and F, p-value = 0.037 and 0.0054 respectively). Soil C:N was not  
 259 significantly different among treatments (Fig. 1E, p-value = 0.32).

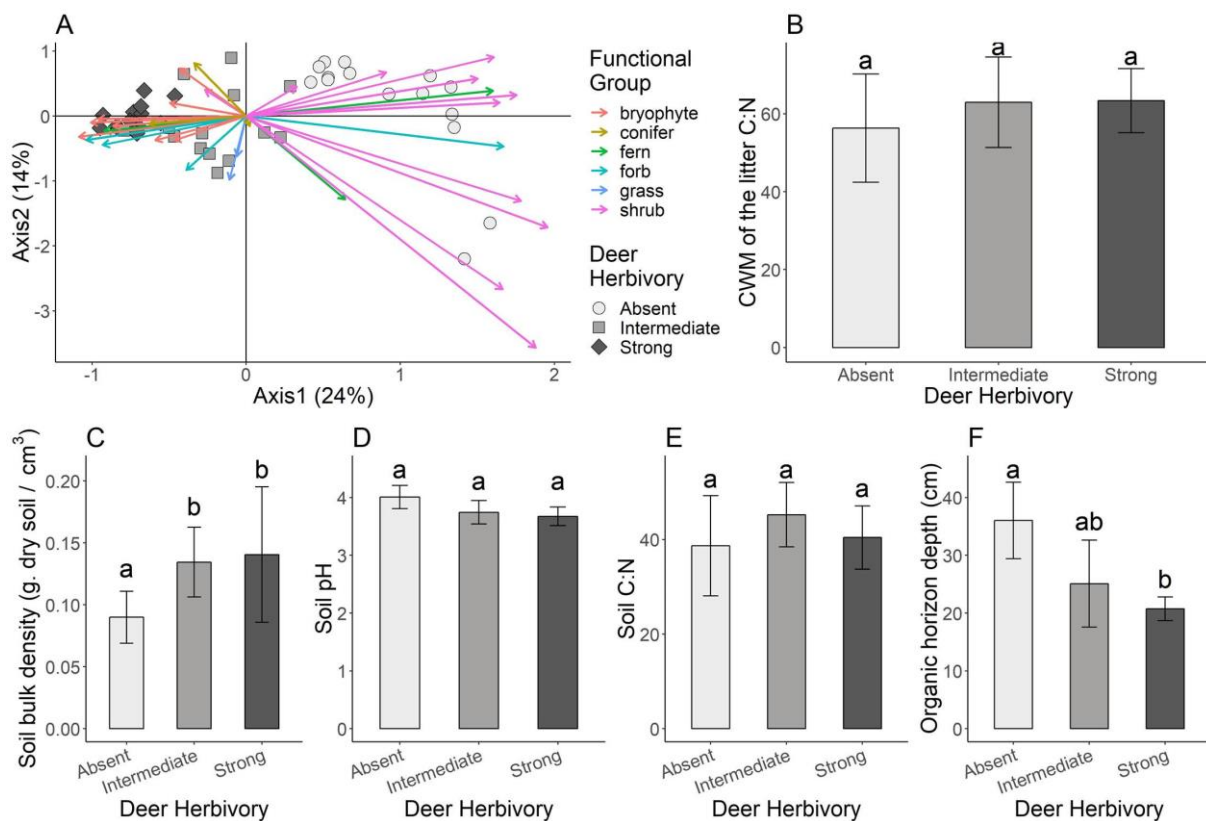

260

261 **Figure 1.** Effect of deer herbivory on aboveground (A, B) and belowground (C to F) parameters. Shades  
 262 of dots and barplots represent the deer herbivory treatment with: light grey = no herbivory (deer  
 263 absent), grey = intermediate (deer present for over 80 years but exposed to significant culls between  
 264 1997 and 2010) and dark grey = strong herbivory (deer present for over 80 years and not exposed to  
 265 hunting). Small letters on each barplot indicate differences tested by post-hoc test. Panel A-  
 266 Correspondence Analysis on the plot vegetation data. Dots represents the plots and arrows indicate  
 267 the species contributions to axis. Plot symbols refer to the three deer herbivory treatments. Plant  
 268 species are classified according to their functional group ; Panel B- Average C:N ratio of the plant  
 269 community; Panel C- Soil bulk density; Panel D- Soil pH; Panel E- Soil C:N ratio; Panel F- Organic horizon  
 270 depth.

271 *Decomposition of plant community litter*

272 The loss of carbon in the litter was highest for litter originating from islands without deer and lowest  
273 for litter from islands with the most severe browsing pressure (Fig. 2A,  $F = 108.78$ ,  $p\text{-value} = <2e^{-16}$ ).  
274 When compared to litter originating from the island with no deer, Carbon loss was reduced by 12% in  
275 litter collected from the island with intermediate herbivory, and by 30% in litter collected from the  
276 island with strong herbivory, this independently of the decomposition context (Fig. 2A). Home field  
277 advantage was not significant, indicating that decomposers were not more efficient in decomposing  
278 litter carbon when it originated from their own environment rather than from other sites (Fig. 2B). The  
279 ability of the micro-fauna and microorganisms to decompose carbon was significantly higher for litter  
280 placed in plots without deer than in plots on islands with deer (Fig. 2B,  $p\text{-value} = 0.008$ ). All litters  
281 decomposed 5% slower when incubated in the plots from the island with strong deer herbivory than  
282 in those from the island without deer. Litter quality was the main driver of carbon loss. Litter mixes  
283 originating from the island with no deer had the best quality index, followed by the litter mixes  
284 originating from the island with intermediate deer herbivory and then by litter mixes originating from  
285 the island with strong deer herbivory (Fig. 2B).  
286 Litter mixes from the island without deer had significantly higher nitrogen loss than litter mixes from  
287 islands with deer. However, unlike C loss, nitrogen loss was lower for litter mixes originating from the  
288 island with intermediate deer herbivory than that originating from the island with strong deer  
289 herbivory (45% and 30% respectively, Fig. 2C,  $F = 17.53$ ,  $p\text{-value} = 2.07e^{-07}$ ). We detected no home field  
290 advantage for N loss (Fig. 2D). In addition, none of the decomposer communities were better at  
291 decomposing and releasing nitrogen.

292

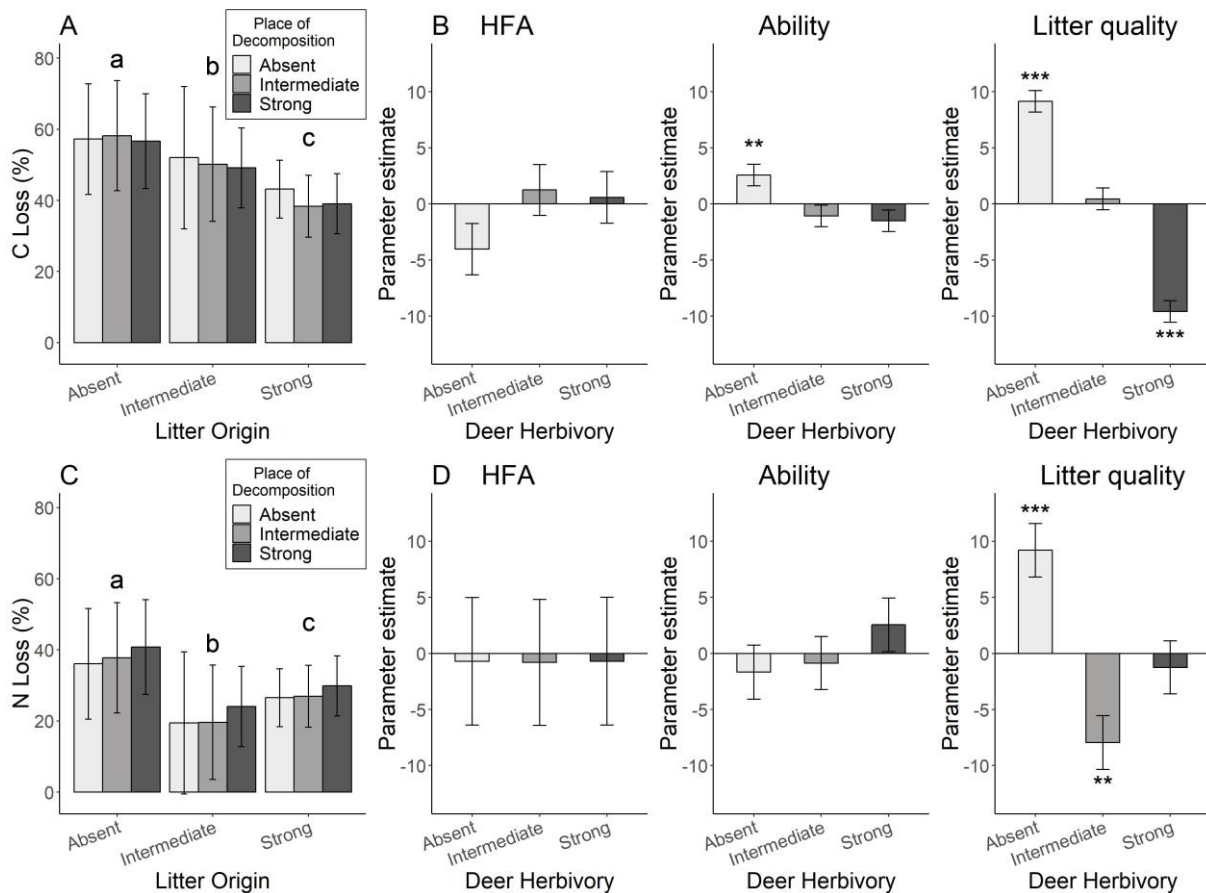

293

294 **Figure 2.** Decomposition rate of the plant community litter among deer herbivory categories for carbon  
 295 (top) and nitrogen (bottom) in small mesh litterbags evaluated by translocation experiment. Shades of  
 296 barplots represent the deer herbivory with: light grey = no herbivory (deer absent), grey = intermediate  
 297 (deer present for over 80 years but deer density reduced by culls between 1997 and 2010) and dark  
 298 grey = strong herbivory (deer present for over 80 years but not exposed to hunting, highest deer  
 299 density). Asterisks indicate estimates significantly different from zero with \* <math>p < 0.05</math>, \*\* <math>p < 0.01</math>,  
 300 \*\*\* <math>p < 0.001</math>. Small letters in each barplots indicate differences tested by post-hoc test. Panel A and  
 301 Panel C represent carbon and nitrogen loss among treatments respectively with bars grouped  
 302 according to litter origin and shades corresponding to the category of deer herbivory where the litter  
 303 bags were placed. Panel B and D represent the parameter estimates ( $\pm$  SE) calculated using the  
 304 Decomposer Ability Regression Test proposed by Keiser et al. (2014).

305

306 Carbon and nitrogen loss were significantly and negatively related to the C:N ratio Community  
 307 Weighted Mean (CWM) of the litter (Fig. 3). Litter nitrogen loss was strongly linked to C:N CWM, which  
 308 explained 50% of its variability (Table S2). This link was stronger than the one observed for carbon, for  
 309 which C:N CWM explained only 10% of its variation (Table S2).

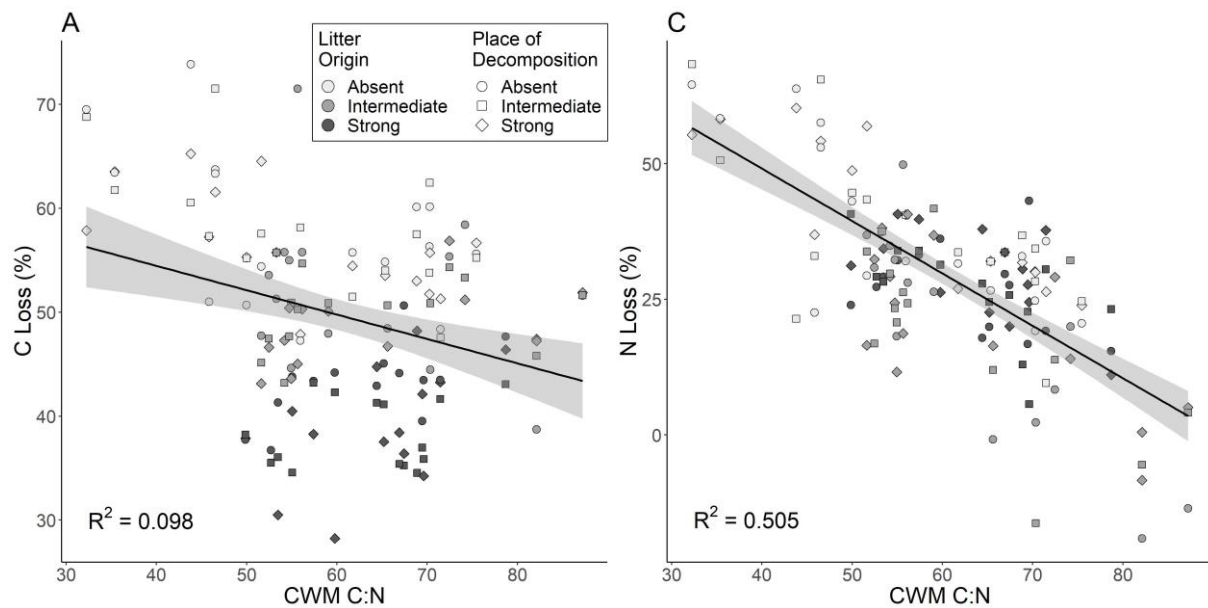

310  
311 **Figure 3.** Linear regression of carbon (left) and nitrogen (right) loss variability with plant C:N  
312 Community Weighted Mean. Shades of dots represent the deer herbivory on the island where the litter  
313 came from, with: light grey = no herbivory (deer absent), grey = intermediate (deer present for over  
314 80 years but not exposed to hunting, highest deer density) and dark grey = strong herbivory (deer  
315 present for over 80 years but not exposed to hunting, highest deer density). The shape of the symbols  
316 refer to the browsing category of the island where we placed the litterbags. Details on regressions  
317 models are given in Table S2

318  
319 Results of mass loss in coarse mesh litterbags were similar to those from fine mesh litterbags, although  
320 variability between replicates was greater (Table S2). Mass loss in litter mixes originating from islands  
321 with intermediate and strong deer herbivory were respectively 26% and 38% lower than in litter mixes  
322 originating from the plots on the island without deer ( $p$ -value  $< 2e^{-16}$ ). Decomposers in the plots from  
323 the island with strong deer herbivory had significantly lower decomposition ability in large mesh bags.  
324 We observed a 25% decrease in mass loss in large mesh bags placed on the island with strong deer  
325 herbivory compared to bags placed on the island without deer (Figure S2 D,  $p$ -value = 0.006).

### 326 *Feces decomposition*

327 There were no differences in carbon and nitrogen loss from feces placed among the islands with  
328 different deer herbivory (Fig. 4A and B,  $F = 1.386$ ,  $p$ -value = 0.26 and  $F = 0.416$ ,  $p$ -value = 0.66  
329 respectively). Feces addition significantly increased the decomposition of *P. sitchensis* litter by 31% for  
330 carbon and 47% for nitrogen (Fig. 4C and D,  $F = 175.62$ ,  $p$ -value  $< 2e^{-16}$  and  $F = 66.39$ ,  $p$ -value =  $3.56e^{-16}$ ).

331 <sup>12</sup> respectively). The ability of the decomposer community (= decomposition place) had no effect on  
332 carbon lost (Fig. 4C,  $F = 0.752$  and  $p$ -value = 0.47) by *P. sitchensis* litter. However, for nitrogen loss by  
333 *P. sitchensis* litter, the presence of deer feces together with, improved the decomposition ability of the  
334 decomposer community in the plots from the islands subject to herbivory (Fig. 4D,  $F = 20.10$ ,  $p$ -value  
335 =  $7.89e^{-08}$ ).  
336 In coarse mesh litterbags we found that mass loss from feces was 15% higher on islands with deer than  
337 on islands without deer (Figure S3,  $p$ -value =  $2.2e^{-16}$ ). The addition of feces also enhanced the  
338 decomposition of *P. sitchensis* litter in coarse mesh litterbags (Figure S2,  $p$ -value = 0.047).

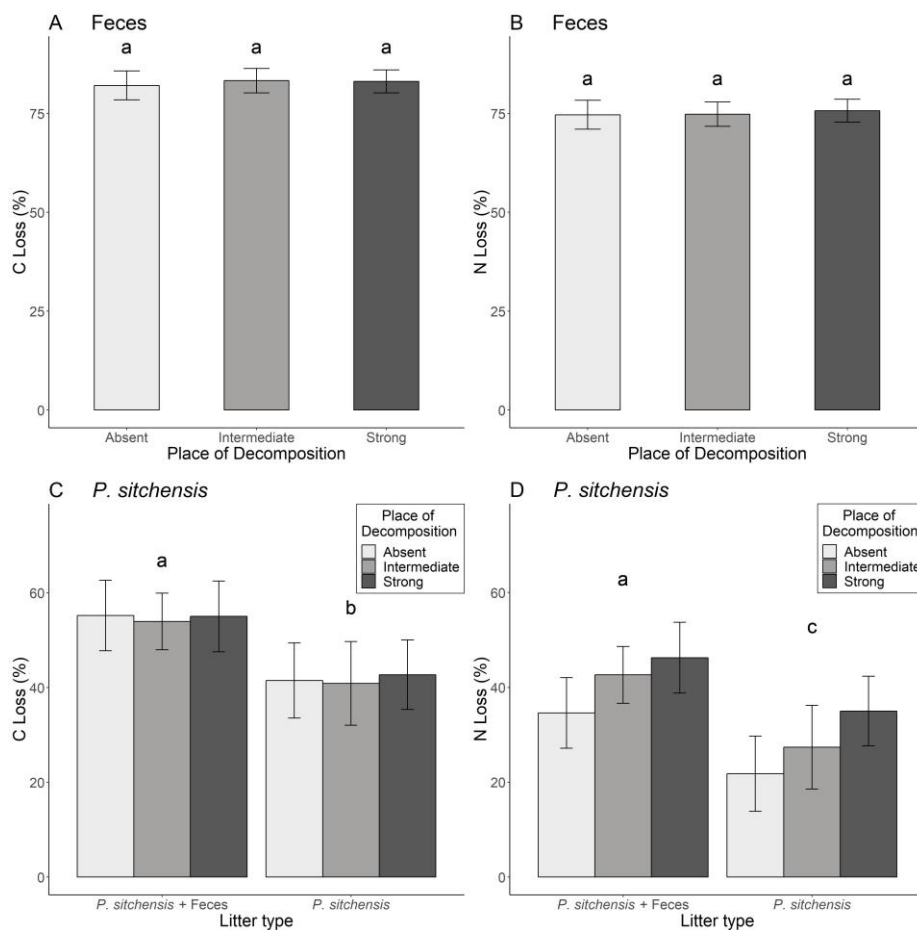

339

340 **Figure 4.** Decomposition of feces (top) and effect of feces addition on decomposition of *Picea sitchensis*  
341 litter (bottom) in small mesh litterbags. Shades of barplots refer to the deer herbivory category of the  
342 place of decomposition with: light grey = no browsing (deer absent), grey = intermediate (deer present  
343 for over 80 years but not exposed to hunting, highest deer density) and dark grey = strong deer  
344 herbivory (deer present for over 80 years but not exposed to hunting, highest deer density). Panel A –  
345 Carbon loss in feces; Panel B – Nitrogen loss in feces; Panel C – Carbon loss in *P. sitchensis* litter with  
346 and without the addition of feces; Panel D – Nitrogen loss in *P. sitchensis* litter with and without the  
347 addition of feces. Small letters above each barplots indicate differences tested by post-hoc test.

## 348 Discussion

### 349 *Deer slow down decomposition through modification of the understory plant communities*

350 To our knowledge, our study is among the few studies on the effect of large herbivores on  
351 decomposition processes that have attempted to dissociate the relative effect of changes in plant  
352 community composition (community litter quality) from the effects of changes in abiotic soil properties  
353 and decomposer community (decomposers ability). Previous research focused on decomposers' ability  
354 and, when integrating litter quality, considered only the plant specific responses to herbivory (i.e.  
355 changes in plant chemical composition associated to browsing), but neglected the change in plant  
356 species composition and relative abundance. In our study, we demonstrated that herbivores change  
357 the litter quality reaching the forest floor, and that this is the overriding factor governing litter  
358 decomposition, rather than soil properties, composition of the soil decomposer community or home  
359 field advantage. In fact, the major shift in litter quality caused by deer browsing was a 25% reduction  
360 in carbon loss and a 27% reduction nitrogen loss in litter, independent of the location where the litter  
361 bags were placed (island with no, intermediate or strong herbivory). This strong control of litter quality  
362 on C, and especially on N loss, contrasts with the previous assumption that vegetation changes may  
363 affect nitrogen and phosphorus dynamics less than the dynamics of carbon (Bryant, Chapin, & Klein,  
364 1983; Wardle, Bonner, & Barker, 2002).

365 The prevailing importance of change in litter quality that resulted from deer herbivory on  
366 decomposition in the temperate forests we studied is in agreement with the microcosm study of  
367 (Harrison & Bardgett, 2003) who showed that decomposition of birch (*Betula pubescens*) litter,  
368 originating from inside deer exclosures (unbrowsed) in the Scottish Highlands decomposed faster than  
369 litter from outside of the exclosures (browsed), irrespective of the origin of the soil (inside or outside  
370 of exclosures). Conversely, (Olofsson & Oksanen, 2002) in a field translocation experiment assessing  
371 the decomposition of four plant species dominating the vegetation of lightly and heavily grazed tundra  
372 demonstrated a positive effect of herbivory on decomposition rate.



373 The dramatic change in litter quality found in our study is the result of an alteration in the understory  
374 plant community. Intense and prolonged deer browsing dramatically changed the understory plant  
375 composition and cover, resulting in up to a 90% reduction in understory shrub cover, leading to a  
376 dramatic reduction in litter quality. These modifications not only confirm the severe effect of ungulates  
377 on the understory vegetation of Haida Gwaii (Chollet et al., 2013; Martin et al., 2010) but are consistent  
378 with results in other temperate forests (Côté et al., 2004; Boulanger et al., 2018).

379 We found that the reduction in litter quality, and the associated modifications in decomposition  
380 pattern, were only partly driven by the variation in the litter C:N ratio. The decline in litter quality  
381 affected carbon and nitrogen cycles differently. For carbon, litter quality decreased as deer herbivory  
382 increased. For nitrogen, litter quality was poorer in the intermediate deer herbivory than on the island  
383 with strong herbivory. The decline in litter C loss could be explained by the shift from an understory  
384 dominated by more decomposable species (shrubs) towards an understory of less decomposable  
385 species (conifers and bryophytes) as the level of deer herbivory increased. Conifers and bryophytes  
386 are known to have slow decomposition rates due to low N content and high concentrations of  
387 structural carbohydrates and aromatic compounds (Cornwell et al., 2008; Turetsky, Crow, Evans, Vitt,  
388 & Wieder, 2008). The presence of these secondary compounds may largely explain the lower  
389 decomposability of the litter from islands with deer herbivory and thus the slight effect of CWM of  
390 litter C:N ( $\approx 10\%$  of variation explained). The contrasting result we obtained for N loss in litter  
391 decomposition suggests that the vegetation shift caused by deer had different consequences for  
392 nitrogen mineralization. Although there was no overall significant difference in CWM litter C:N ratio  
393 among deer herbivory treatments, the intermediate treatment had the highest values of C:N, which  
394 explains the lowest N loss values observed in this treatment ( $\approx 50\%$  of variation explained by CWM  
395 litter C:N).

396

397

398

399 *Deer also modify decomposers ability*

400 Although the change in litter quality caused by deer herbivory was the main driver of the  
401 decomposition process, several other changes in the soil decomposer communities affected nutrient  
402 cycling.

403 Decomposers from the island without deer had a greater ability to decompose the carbon present in  
404 litter, but not nitrogen. The contrast between carbon and nitrogen decomposition among islands, and  
405 the similarity in C and N decomposition when using large, rather than fine mesh litterbags, suggest  
406 that the observed decomposition patterns are more likely explained by biotic differences in soils (i.e.  
407 differences in decomposer community) than by the effect of abiotic modifications such as higher soil  
408 compaction or lower pH. A possible explanation for the observed contrasts in litter decomposition may  
409 be a switch in the bacterial:fungal ratio in presence of deer. In fact the disappearance of base-rich  
410 shrubs and their replacement by species with high concentrations of phenolic compounds (e.g.  
411 bryophytes) as a result of deer browsing may have increased the dominance of fungi which require  
412 less calcium and magnesium for growth. This change in decomposer community structure would favor  
413 the formation of a mor humus, in which up to 30% of the litter mass is converted to humus rather than  
414 decomposing (Prescott, 2010). In addition the dramatic reduction in shrub cover may have reduced  
415 the root exudate which stimulate bacterial activity (Ekberg, Buchmann, & Gleixner, 2007). Contrary to  
416 carbon, the ability of decomposers to decompose nitrogen in litter did not vary among islands with  
417 different patterns of deer herbivory. This may be explained by the selection of microorganisms better  
418 able to exploit N in environments where this element is the most limiting (“nitrogen mining  
419 hypothesis”, (Craine, Morrow, & Fierer, 2007) compensating for the switch in bacterial:fungal ratio.  
420 This hypothesis is supported by our control experiment, where we used a standardized quality of litter  
421 (*Picea sitchensis*), and found a greater ability of decomposers to decompose N in litter samples  
422 incubated on sites with deer.

423 Interestingly, we also found that the inclusion of the soil macro and mesofauna (hereafter fauna) in  
424 litter decomposition affected decomposition rates at the community scale (Figure S2). Specifically, we

425 found that litter decomposition was reduced on the island with the highest deer density, suggesting a  
426 negative effect of high deer density on the faunal decomposer communities. Previous studies  
427 documented negative effects of large herbivores on the abundance and diversity of the soil fauna (see  
428 review by (Andriuzzi & Wall, 2017)), but the consequences on litter decomposition were not studied.  
429 As most previous studies on the effects of large herbivores on decomposition only considered the role  
430 of microbes, we feel more attention needs to be paid to the role of the soil fauna in order to better  
431 understand ecosystem nutrient cycling.

432 Soil fauna also plays an important role on the decomposition of feces, with evidence of Home Field  
433 Advantage (HFA). Indeed deer feces decomposition in our study was more rapid on islands with deer  
434 (home) than on the island without (away), but only when including the effects of fauna (large mesh  
435 bags, Figure S2). We infer that deer have a positive effect on animals decomposing dung. Such a  
436 positive effect of large herbivores on this specialized fauna has been recently demonstrated in Japan  
437 where (Iida, Soga, & Koike, 2018) found a positive relationship between the populations of dung  
438 beetles and deer density. In our study, we demonstrated that, litter fauna, but not microorganisms,  
439 were selected for decomposition of a particular litter type. This is an important result as most literature  
440 on HFA only considered microorganisms, and this suggests a potential underestimation of fauna on  
441 HFA.

442 Most knowledge on the effect of high quality litter deposition (dung and urine) by large herbivores on  
443 nutrient cycling comes from the study of domestic animals and/or grassland ecosystems (McNaughton,  
444 Banyikwa, & McNaughton, 1997; Frank & Groffman, 1998; Christenson, Mitchell, Groffman, & Lovett,  
445 2010). We demonstrate that in these temperate forests dung decomposed faster, and released more  
446 nitrogen, than observed for plant litter. Also, the addition of feces increased the rate of *Picea sitchensis*  
447 decomposition, increasing C loss by 24% and N loss by 32%. This may be explained by the presence of  
448 labile nutrients in dung, which enhance the development of microbial communities, increasing rates  
449 of nutrient cycling (Bardgett, Keiller, Cook, & Gilburn, 1998). However, despite these results, we found  
450 that high quality litter deposition did not affect global decomposer ability (no higher decomposer

451 ability on islands with deer dung/urine). This is partly surprising as recent studies demonstrated that  
452 feces deposition was responsible for changes in soil nutrient availability and plant productivity  
453 (Barthelemy, Stark, & Olofsson, 2015; J. Wang et al., 2018). The explanation for the lack of effect in the  
454 forests we studied likely rests with the patchy distribution of solitary deer, in contrast to herding  
455 species like reindeer or livestock, and thus reflects the patchy, and limited, amounts of dung deposited  
456 locally, amounts that are not sufficient to influence the nutrient cycling at the ecosystem level (Pastor,  
457 Naiman, Dewey, & McInnes, 1988).

458

## 459 **Conclusion**

460 Although given relatively little attention until recently, we demonstrate that deer in temperate forests  
461 are a key component in ecosystem functioning, modifying aboveground, as well as belowground,  
462 characteristics, and reducing nutrient cycling. In the last few decades, the awareness and knowledge  
463 of the effects of overabundant forest ungulates on aboveground communities has been growing  
464 worldwide (Côté et al., 2004; Takatsuki, 2009). Our study suggests that these aboveground changes  
465 are probably at the root of major modifications in nutrient cycling in temperate forest ecosystems. In  
466 addition, it has to be emphasized that our results are likely an underestimation of effects as we did not  
467 take into account the dramatic effect deer have on the quantity of litter reaching the forest floor. For  
468 example, in Western Europe the current 10 million roe deer (*Capreolus capreolus*), in addition to the  
469 increasing populations of other ungulates, represent a standing biomass estimated at 0.75 billion kg  
470 that consumes  $\approx$ 20 million tons of green vegetation each year (Apollonio et al., 2010). Consequently,  
471 there is an urgent need to expand our results to other temperate forest of the world to assess the  
472 overall consequences of these changes in ungulate abundance on global carbon storage (Tanentzap &  
473 Coomes, 2012) and nitrogen cycling in soils (Hobbie & Villéger, 2015).

474

475

476

## 477 **Statement of authorship**

478 SC conceived the ideas and designed methodology; SC, MM, JS and J-LM collected the data; SC and  
479 MM analyzed the data; SC and MM led the writing of the manuscript. All authors contributed  
480 critically to the drafts and gave final approval for publication.

481

## 482 **Acknowledgements**

483 We want to thank Catch Catomeris, Maria Continentino, Yonadav Anbar, Barb Roswell and Max Bullock  
484 for their support in the field. This research was financially supported by the France Canada Research  
485 Fund (FCRF), University of Rennes 1 (“Défis scientifiques émergents”), the French Embassy in Canada,  
486 the French consulate in Vancouver and the Mitacs Globalink Research Award. The Research Group on  
487 Introduced Species provided financial and logistic support. The Laskeek Bay Conservation Society  
488 provided logistic support as did many members of the Haida Gwaii communities.

489

## 490 **References**

- 491 Andriuzzi, W. S., & Wall, D. H. (2017). Responses of belowground communities to large aboveground  
492 herbivores: Meta-analysis reveals biome-dependent patterns and critical research gaps. *Global*  
493 *Change Biology*, 23(9), 3857–3868. doi: 10.1111/gcb.13675
- 494 Apollonio, M., Andersen, R., & Putman, R. (2010). *European Ungulates and Their Management in the*  
495 *21st Century*. Cambridge University Press.
- 496 Austin, A. T., Vivanco, L., González-Arzac, A., & Pérez, L. I. (2014). There’s no place like home? An  
497 exploration of the mechanisms behind plant litter–decomposer affinity in terrestrial  
498 ecosystems. *New Phytologist*, 204(2), 307–314. doi: 10.1111/nph.12959
- 499 Ayres, E., Steltzer, H., Simmons, B. L., Simpson, R. T., Steinweg, J. M., Wallenstein, M. D., ... Wall, D. H.  
500 (2009). Home-field advantage accelerates leaf litter decomposition in forests. *Soil Biology and*  
501 *Biochemistry*, 41(3), 606–610. doi: 10.1016/j.soilbio.2008.12.022
- 502 Banner, A., MacKenzie, W. H., Pojar, J., MacKinnon, A., Saunders, S. C., & Klassen, H. (2014). *A Field*  
503 *Guide to Ecosystem Classification and Identification for Haida Gwaii* (Prov. B.C., Victoria, B.C.  
504 Land Manag. Handb. 68.).
- 505 Bardgett, R. D., Keiller, S., Cook, R., & Gilburn, A. S. (1998). Dynamic interactions between soil animals  
506 and microorganisms in upland grassland soils amended with sheep dung: a microcosm  
507 experiment. *Soil Biology and Biochemistry*, 30(4), 531–539. doi: 10.1016/S0038-  
508 0717(97)00146-6
- 509 Bardgett, R. D., & Wardle, D. A. (2003). Herbivore-Mediated Linkages Between Aboveground and  
510 Belowground Communities. *Ecology*, 84(9), 2258–2268. doi: 10.1890/02-0274
- 511 Barthelemy, H., Stark, S., & Olofsson, J. (2015). Strong Responses of Subarctic Plant Communities to  
512 Long-Term Reindeer Feces Manipulation. *Ecosystems*, 18(5), 740–751. doi: 10.1007/s10021-  
513 015-9856-y

- 514 Boulanger, V., Dupouey, J.-L., Archaux, F., Badeau, V., Baltzinger, C., Chevalier, R., ... Ulrich, E. (2018).  
515 Ungulates increase forest plant species richness to the benefit of non-forest specialists. *Global*  
516 *Change Biology*, 24(2), e485–e495. doi: 10.1111/gcb.13899
- 517 Bryant, J. P., Chapin, F. S., & Klein, D. R. (1983). Carbon/Nutrient Balance of Boreal Plants in Relation  
518 to Vertebrate Herbivory. *Oikos*, 40(3), 357–368. doi: 10.2307/3544308
- 519 Chapin, F. S. I., Matson, P. A., & Vitousek, P. (2011). *Principles of Terrestrial Ecosystem Ecology* (2nd  
520 ed.). Retrieved from [https://www-springer-com.passerelle.univ-](https://www-springer-com.passerelle.univ-rennes1.fr/us/book/9781441995032)  
521 [rennes1.fr/us/book/9781441995032](https://www-springer-com.passerelle.univ-rennes1.fr/us/book/9781441995032)
- 522 Chollet, S., Baltzinger, C., Ostermann, L., Saint-André, F., & Martin, J.-L. (2013). Importance for forest  
523 plant communities of refuges protecting from deer browsing. *Forest Ecology and*  
524 *Management*, 289, 470–477. doi: 10.1016/j.foreco.2012.10.043
- 525 Chollet, S., Bergman, C., Gaston, A. J., & Martin, J.-L. (2015). Long-term consequences of invasive deer  
526 on songbird communities: Going from bad to worse? *Biological Invasions*, 17(2), 777–790. doi:  
527 10.1007/s10530-014-0768-0
- 528 Chollet, S., & Martin, J.-L. (2013). Declining woodland birds in North America: should we blame Bambi?  
529 *Diversity and Distributions*, 19(4), 481–483. doi: 10.1111/ddi.12003
- 530 Chollet, S., Padié, S., Stockton, S., Allombert, S., Gaston, A. J., & Martin, J.-L. (2016). Positive plant and  
531 bird diversity response to experimental deer population reduction after decades of  
532 uncontrolled browsing. *Diversity and Distributions*, 22(3), 274–287. doi: 10.1111/ddi.12393
- 533 Christenson, L. M., Mitchell, M. J., Groffman, P. M., & Lovett, G. M. (2010). Winter climate change  
534 implications for decomposition in northeastern forests: comparisons of sugar maple litter with  
535 herbivore fecal inputs. *Global Change Biology*, 16(9), 2589–2601. doi: 10.1111/j.1365-  
536 2486.2009.02115.x
- 537 Cline, L. C., Zak, D. R., Upchurch, R. A., Freedman, Z. B., & Peschel, A. R. (2017). Soil microbial  
538 communities and elk foraging intensity: implications for soil biogeochemical cycling in the  
539 sagebrush steppe. *Ecology Letters*, 20(2), 202–211. doi: 10.1111/ele.12722
- 540 Cornwell, W. K., Cornelissen, J. H. C., Amatangelo, K., Dorrepaal, E., Eviner, V. T., Godoy, O., ... Westoby,  
541 M. (2008). Plant species traits are the predominant control on litter decomposition rates  
542 within biomes worldwide. *Ecology Letters*, 11(10), 1065–1071. doi: 10.1111/j.1461-  
543 0248.2008.01219.x
- 544 Côté, S. D., Rooney, T. P., Tremblay, J.-P., Dussault, C., & Waller, D. M. (2004). Ecological Impacts of  
545 Deer Overabundance. *Annual Review of Ecology, Evolution, and Systematics*, 35(1), 113–147.  
546 doi: 10.1146/annurev.ecolsys.35.021103.105725
- 547 Craine, J. M., Morrow, C., & Fierer, N. (2007). Microbial Nitrogen Limitation Increases Decomposition.  
548 *Ecology*, 88(8), 2105–2113. doi: 10.1890/06-1847.1
- 549 DellaSala, D. A. (2011). *Temperate and Boreal Rainforests of the World: Ecology and Conservation*.  
550 Island Press.
- 551 Ekberg, A., Buchmann, N., & Gleixner, G. (2007). Rhizospheric influence on soil respiration and  
552 decomposition in a temperate Norway spruce stand. *Soil Biology and Biochemistry*, 39(8),  
553 2103–2110. doi: 10.1016/j.soilbio.2007.03.024
- 554 Eldridge, D. J., Delgado-Baquerizo, M., Travers, S. K., Val, J., Oliver, I., Hamonts, K., & Singh, B. K. (2017).  
555 Competition drives the response of soil microbial diversity to increased grazing by vertebrate  
556 herbivores. *Ecology*, 98(7), 1922–1931. doi: 10.1002/ecy.1879
- 557 Foster, C. N., Barton, P. S., & Lindenmayer, D. B. (2014). Effects of large native herbivores on other  
558 animals. *Journal of Applied Ecology*, 51(4), 929–938. doi: 10.1111/1365-2664.12268
- 559 Frank, D. A., & Groffman, P. M. (1998). Ungulate Vs. Landscape Control of Soil C and N Processes in  
560 Grasslands of Yellowstone National Park. *Ecology*, 79(7), 2229–2241. doi: 10.1890/0012-  
561 9658(1998)079[2229:UVLCOS]2.0.CO;2
- 562 Gass, T. M., & Binkley, D. (2011). Soil nutrient losses in an altered ecosystem are associated with native  
563 ungulate grazing. *Journal of Applied Ecology*, 48(4), 952–960. doi: 10.1111/j.1365-  
564 2664.2011.01996.x

- 565 Gaston, A. J., Stockton, S. A., & Smith, J. L. (2006). Species-area relationships and the impact of deer-  
566 browse in the complex phytogeography of the Haida Gwaii archipelago (Queen Charlotte  
567 Islands), British Columbia. *Écoscience*, 13(4), 511–522. doi: 10.2980/1195-  
568 6860(2006)13[511:SRATIO]2.0.CO;2
- 569 Gholz, H. L., Wedin, D. A., Smitherman, S. M., Harmon, M. E., & Parton, W. J. (2000). Long-term  
570 dynamics of pine and hardwood litter in contrasting environments: toward a global model of  
571 decomposition. *Global Change Biology*, 6(7), 751–765. doi: 10.1046/j.1365-2486.2000.00349.x
- 572 Gill, R. M. A. (1992). A Review of Damage by Mammals in North Temperate Forests: 3. Impact on Trees  
573 and Forests. *Forestry: An International Journal of Forest Research*, 65(4), 363–388. doi:  
574 10.1093/forestry/65.4.363-a
- 575 Golumbia, T., Bland, L., Morre, K., & Bartier, P. (2008). History and current status of introduced species  
576 on Haida Gwaii. In *Lessons from the islands: introduced species and what they tell us about*  
577 *how ecosystems work* (Canadian Wildlife Service, Environment Canada, Vols. 1–Queen  
578 Charlotte City, pp. 8–31). Ottawa: Gaston AJ, Golumbia TE, Martin JL, Sharpe ST.
- 579 Handa, I. T., Aerts, R., Berendse, F., Berg, M. P., Bruder, A., Butenschoen, O., ... Hättenschwiler, S.  
580 (2014). Consequences of biodiversity loss for litter decomposition across biomes. *Nature*,  
581 509(7499), 218–221. doi: 10.1038/nature13247
- 582 Harrison, K. A., & Bardgett, R. D. (2003). How browsing by red deer impacts on litter decomposition in  
583 a native regenerating woodland in the Highlands of Scotland. *Biology and Fertility of Soils*,  
584 38(6), 393–399. doi: 10.1007/s00374-003-0667-5
- 585 Hobbie, S. E., & Villéger, S. (2015). Interactive effects of plants, decomposers, herbivores, and  
586 predators on nutrient cycling. In *Trophic ecology: Bottom-up and top-down interactions across*  
587 *aquatic and terrestrial systems* (Cambridge University Press). Cambridge: Torrance C. Hanley;  
588 Kimberley J. La Pierre.
- 589 Horsley, S. B., Stout, S. L., & DeCalesta, D. S. (2003). White-tailed deer impact on the vegetation  
590 dynamics of a northern hardwood forest. *Ecological Applications*.
- 591 Iida, T., Soga, M., & Koike, S. (2018). Large herbivores affect forest ecosystem functions by altering the  
592 structure of dung beetle communities. *Acta Oecologica*, 88, 65–70. doi:  
593 10.1016/j.actao.2018.03.003
- 594 Keiser, A. D., Keiser, D. A., Strickland, M. S., & Bradford, M. A. (2014). Disentangling the mechanisms  
595 underlying functional differences among decomposer communities. *Journal of Ecology*, 102(3),  
596 603–609. doi: 10.1111/1365-2745.12220
- 597 Londo, G. (1976). The decimal scale for relevés of permanent quadrats. *Vegetatio*, 33(1), 61–64. doi:  
598 10.1007/BF00055300
- 599 Martin, J.-L., & Baltzinger, C. (2002). Interaction among deer browsing, hunting, and tree regeneration.  
600 *Canadian Journal of Forest Research*, 32(7), 1254–1264. doi: 10.1139/x02-043
- 601 Martin, J.-L., Stockton, S. A., Allombert, S., & Gaston, A. J. (2010). Top-down and bottom-up  
602 consequences of unchecked ungulate browsing on plant and animal diversity in temperate  
603 forests: lessons from a deer introduction. *Biological Invasions*, 12(2), 353–371. doi:  
604 10.1007/s10530-009-9628-8
- 605 McNaughton, S. J., Banyikwa, F. F., & McNaughton, M. M. (1997). Promotion of the Cycling of Diet-  
606 Enhancing Nutrients by African Grazers. *Science*, 278(5344), 1798–1800. doi:  
607 10.1126/science.278.5344.1798
- 608 McShea, W., Underwood, H., & Rappole, J. (1997). *The Science of Overabundance: Deer Ecology and*  
609 *Population Management* (DC: Smithsonian. Inst. Press.). Washington.
- 610 Olofsson, J., & Oksanen, L. (2002). Role of litter decomposition for the increased primary production  
611 in areas heavily grazed by reindeer: a litterbag experiment. *Oikos*, 96(3), 507–515. doi:  
612 10.1034/j.1600-0706.2002.960312.x
- 613 Olson, D. M., Dinerstein, E., Wikramanayake, E. D., Burgess, N. D., Powell, G. V. N., Underwood, E. C.,  
614 ... Kassem, K. R. (2001). Terrestrial Ecoregions of the World: A New Map of Life on Earth A new  
615 global map of terrestrial ecoregions provides an innovative tool for conserving biodiversity.  
616 *BioScience*, 51(11), 933–938. doi: 10.1641/0006-3568(2001)051[0933:TEOTWA]2.0.CO;2

- 617 Pastor, J., Naiman, R. J., Dewey, B., & McInnes, P. (1988). Moose, Microbes, and the Boreal Forest.  
618 *BioScience*, 38(11), 770–777. doi: 10.2307/1310786
- 619 Penner, J. F., & Frank, D. A. (2018). Litter Decomposition in Yellowstone Grasslands: The Roles of Large  
620 Herbivores, Litter Quality, and Climate. *Ecosystems*. doi: 10.1007/s10021-018-0310-9
- 621 Prescott, C. E. (2010). Litter decomposition: what controls it and how can we alter it to sequester more  
622 carbon in forest soils? *Biogeochemistry*, 101(1), 133–149. doi: 10.1007/s10533-010-9439-0
- 623 R Core Team. (2017). *R: A language and environment for statistical computing*. R Foundation for  
624 *Statistical Computing, Vienna, Austria*. Retrieved from <https://www.R-project.org/>
- 625 Royo, A. A., Collins, R., Adams, M. B., Kirschbaum, C., & Carson, W. P. (2010). Pervasive interactions  
626 between ungulate browsers and disturbance regimes promote temperate forest herbaceous  
627 diversity. *Ecology*. doi: 10.1890/08-1680.1
- 628 Sitters, J., Bakker, E. S., Veldhuis, M. P., Veen, G. F., Olde Venterink, H., & Vanni, M. J. (2017). The  
629 Stoichiometry of Nutrient Release by Terrestrial Herbivores and Its Ecosystem Consequences.  
630 *Frontiers in Earth Science*, 5. doi: 10.3389/feart.2017.00032
- 631 Sutherland Brown, A. (1968). *Geology of the Queen Charlotte Islands, British Columbia* (B.C. Ministry  
632 of Energy, Mines and Petroleum Resources Bulletin 54).
- 633 Takatsuki, S. (2009). Effects of sika deer on vegetation in Japan: A review. *Biological Conservation*,  
634 142(9), 1922–1929. doi: 10.1016/j.biocon.2009.02.011
- 635 Tanentzap, A. J., & Coomes, D. A. (2012). Carbon storage in terrestrial ecosystems: do browsing and  
636 grazing herbivores matter? *Biological Reviews*, 87(1), 72–94. doi: 10.1111/j.1469-  
637 185X.2011.00185.x
- 638 Terborgh, J., & Estes, J. A. (2013). *Trophic Cascades: Predators, Prey, and the Changing Dynamics of*  
639 *Nature*. Island Press.
- 640 Turetsky, M. R., Crow, S. E., Evans, R. J., Vitt, D. H., & Wieder, R. K. (2008). Trade-offs in resource  
641 allocation among moss species control decomposition in boreal peatlands. *Journal of Ecology*,  
642 96(6), 1297–1305. doi: 10.1111/j.1365-2745.2008.01438.x
- 643 Vila, B., Torre, F., Guibal, F., & Martin, J.-L. (2004). Can we reconstruct browsing history and how far  
644 back? Lessons from *Vaccinium parvifolium* Smith in Rees. *Forest Ecology and Management*,  
645 201(2), 171–185. doi: 10.1016/j.foreco.2004.06.026
- 646 Wang, J., Wang, D., Li, C., Seastedt, T. R., Liang, C., Wang, L., ... Li, Y. (2018). Feces nitrogen release  
647 induced by different large herbivores in a dry grassland. *Ecological Applications*, 28(1), 201–  
648 211. doi: 10.1002/eap.1640
- 649 Wang, Z., Yuan, X., Wang, D., Zhang, Y., Zhong, Z., Guo, Q., & Feng, C. (2018). Large herbivores influence  
650 plant litter decomposition by altering soil properties and plant quality in a meadow steppe.  
651 *Scientific Reports*, 8(1), 9089. doi: 10.1038/s41598-018-26835-1
- 652 Wardle, D. A., Bonner, K. I., & Barker, G. M. (2002). Linkages between plant litter decomposition, litter  
653 quality, and vegetation responses to herbivores. *Functional Ecology*, 16(5), 585–595. doi:  
654 10.1046/j.1365-2435.2002.00659.x
- 655 Wheeler, B. (2010). *Package "ImPerm."*

658

659

660

661

662



663 **Supporting Information**

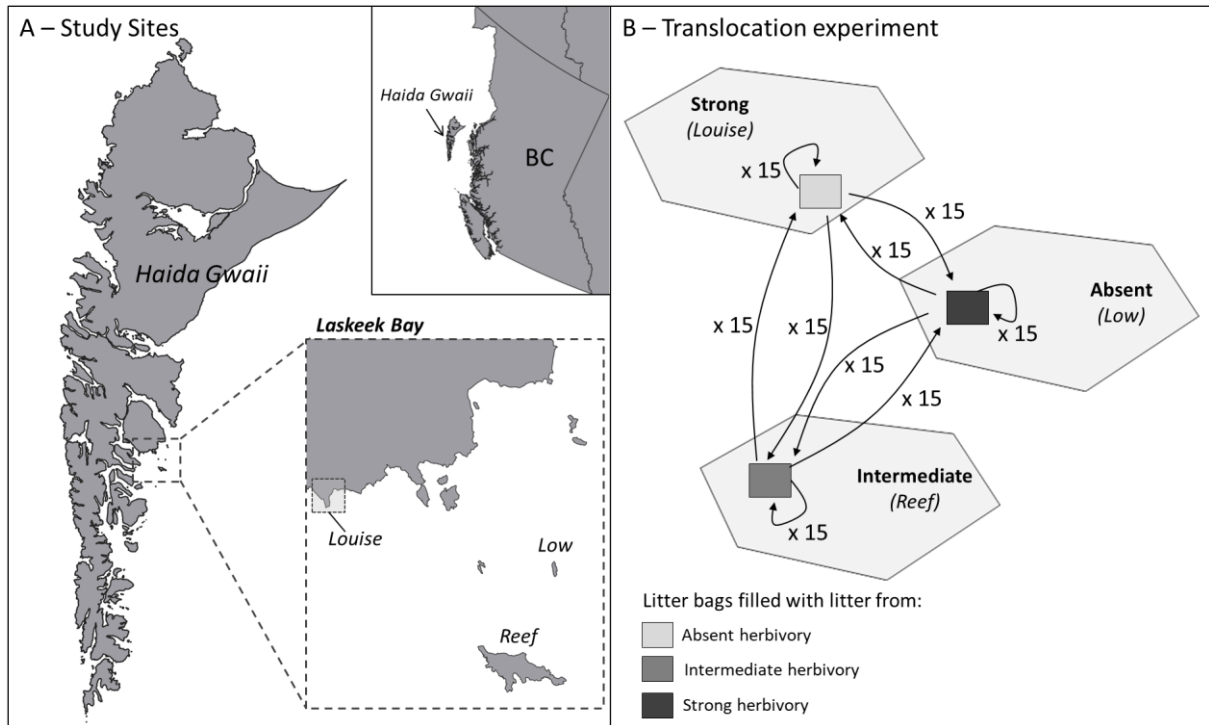

664

665 **Figure S1.** Study area and experimental design. A – Map of the study sites, B – Translocation pattern  
666 in the experiment 1. Absent = no deer, Intermediate = deer present for over 80 years but exposed to  
667 significant culls between 1997 and 2010, Strong = deer present for over 80 years but not exposed to  
668 hunting  
669

670

671

672

673

674

675

676

677

678

679

680

681 **Table S1.** Table synthesizing previously published results on the effect of deer on aboveground ecology  
 682 of Haida Gwaii o islands covering the entire range of island sizes found in the archipelago

| Reference                                                | Method/protocol                                                                                                              | Main results                                                                                                                                                                                                  |
|----------------------------------------------------------|------------------------------------------------------------------------------------------------------------------------------|---------------------------------------------------------------------------------------------------------------------------------------------------------------------------------------------------------------|
| <b>Martin et al 1995,</b><br>Oikos                       | Songbird and vegetation sampling, 65 islands ranging from 1 to >300,000 ha                                                   | Except for the smallest most remote islands never colonized by deer, deer presence is the key factor explaining plant and animal distribution and community structure                                         |
| <b>Engelstoft 1995,</b><br>Master's thesis               | Vegetation sampling on Graham (6,361 km <sup>2</sup> ) and Moresby Islands (3,399 km <sup>2</sup> )                          | Deer have dramatically reduced the understory vegetation and keep the sparse understory from recovering. Deer will also have profound affects on the overstory by eliminating recruitment of Western Redcedar |
| <b>Martin &amp; Baltzinger 2002,</b> Can. J. For. Res.   | Graham (6,361 km <sup>2</sup> ) and Moresby Islands (3,399 km <sup>2</sup> ): in different contexts of deer hunting pressure | Regeneration of western redcedar ( <i>Thuja plicata</i> ) is drastically reduced in presence of deer                                                                                                          |
| <b>Allombert et al. 2005,</b><br>Conservation Biology    | Six small islands of Laskeek Bay with different browsing histories (no deer vs deer present)                                 | Insect abundance in the vegetation decreased eightfold and species density sixfold on islands with deer                                                                                                       |
| <b>Stockton et al. 2005,</b><br>Biological Conservation  | Seven small islands of Laskeek Bay with different browsing histories (no deer vs deer present)                               | Vegetation cover exceeded 80% in the lower vegetation layers on islands without deer and was less than 10% on the islands with deer                                                                           |
| <b>Gaston et al. 2006,</b><br>Ecoscience                 | Ten islands of Laskeek Bay with different browsing histories (no deer vs deer present) ranging from 4.5 to 395 ha            | Reversal of the normal species number-island area relationship as a result of deer browsing. Conclude that deer are a major factor structuring the island plant communities                                   |
| <b>Stroh et al. 2008,</b><br>Forest Ecology & Management | Graham (6,361 km <sup>2</sup> ): deer exclosure                                                                              | Protected seedlings survived better, were higher, presented more leafed shoots, and had less stems than unprotected individuals                                                                               |
| <b>Chollet et al. 2015,</b><br>Biological Invasions      | 57 islands ranging from 1 to 425 ha with different browsing histories                                                        | Deer are the main factor explaining the abundance of understory vegetation and understory songbirds on the islands except for the few small isolated islands never colonized by deer.                         |

683

684

685 **Table S2.** – ANOVA tables of the models explaining carbon and nitrogen loss according to the  
 686 decomposition place, the CWM and the Rao litter :N

| Model                    | F-value | p-value                   | R <sup>2</sup> |
|--------------------------|---------|---------------------------|----------------|
| <b>C loss ~</b>          |         |                           |                |
| CWM                      | 11.49   | <b>9.4 e<sup>-4</sup></b> |                |
| Decomposition place      | 0.99    | 0.38                      | 0.098          |
| CWM* Decomposition place | 0.09    | 0.92                      |                |
| <b>N loss ~</b>          |         |                           |                |
| CWM                      | 119.75  | <b>2e<sup>-16</sup></b>   |                |
| Decomposition place      | 1.77    | 0.18                      | 0.505          |
| CWM* Decomposition place | 0.96    | 0.38                      |                |

687

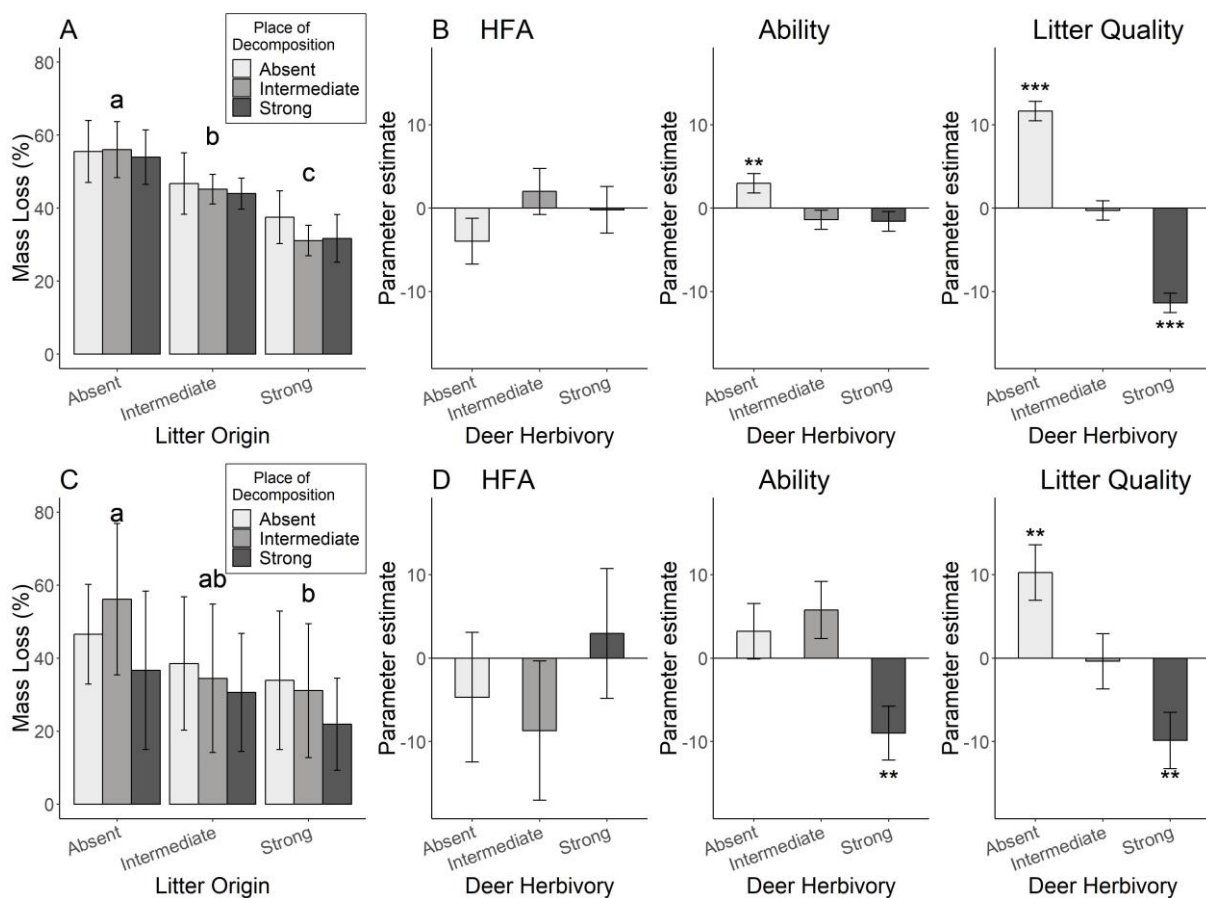

688

689 **Figure S2.** - Decomposition rate of the plant community litter among herbivory treatments for fine  
 690 mesh literbags (top) and large mesh literbags (bottom) evaluated by translocation experiment. Shades  
 691 of barplots represent the herbivory treatment with: light grey = no browsing (no deer), grey =  
 692 intermediate (deer present for over 80 years but exposed to significant culls between 1997 and 2010)  
 693 and dark grey = strong herbivory treatment (deer present for over 80 years but not exposed to  
 694 hunting). Asterisks indicate estimates significantly different from zero with \* <math>p < 0.05</math>, \*\* <math>p < 0.01</math>,  
 695 \*\*\* <math>p < 0.001</math>. Panel A and Panel C represent mass loss among treatments in fine and coarse mesh litter  
 696 bags respectively with bars grouped according to herbivory treatment of litter origin and colors  
 697 corresponding to the location of decomposition. Panel B and D represent the parameter estimates ( $\pm$   
 698 SE) calculated using the Decomposer Ability Regression Test proposed by Keiser et al. (2014)  
 699

700

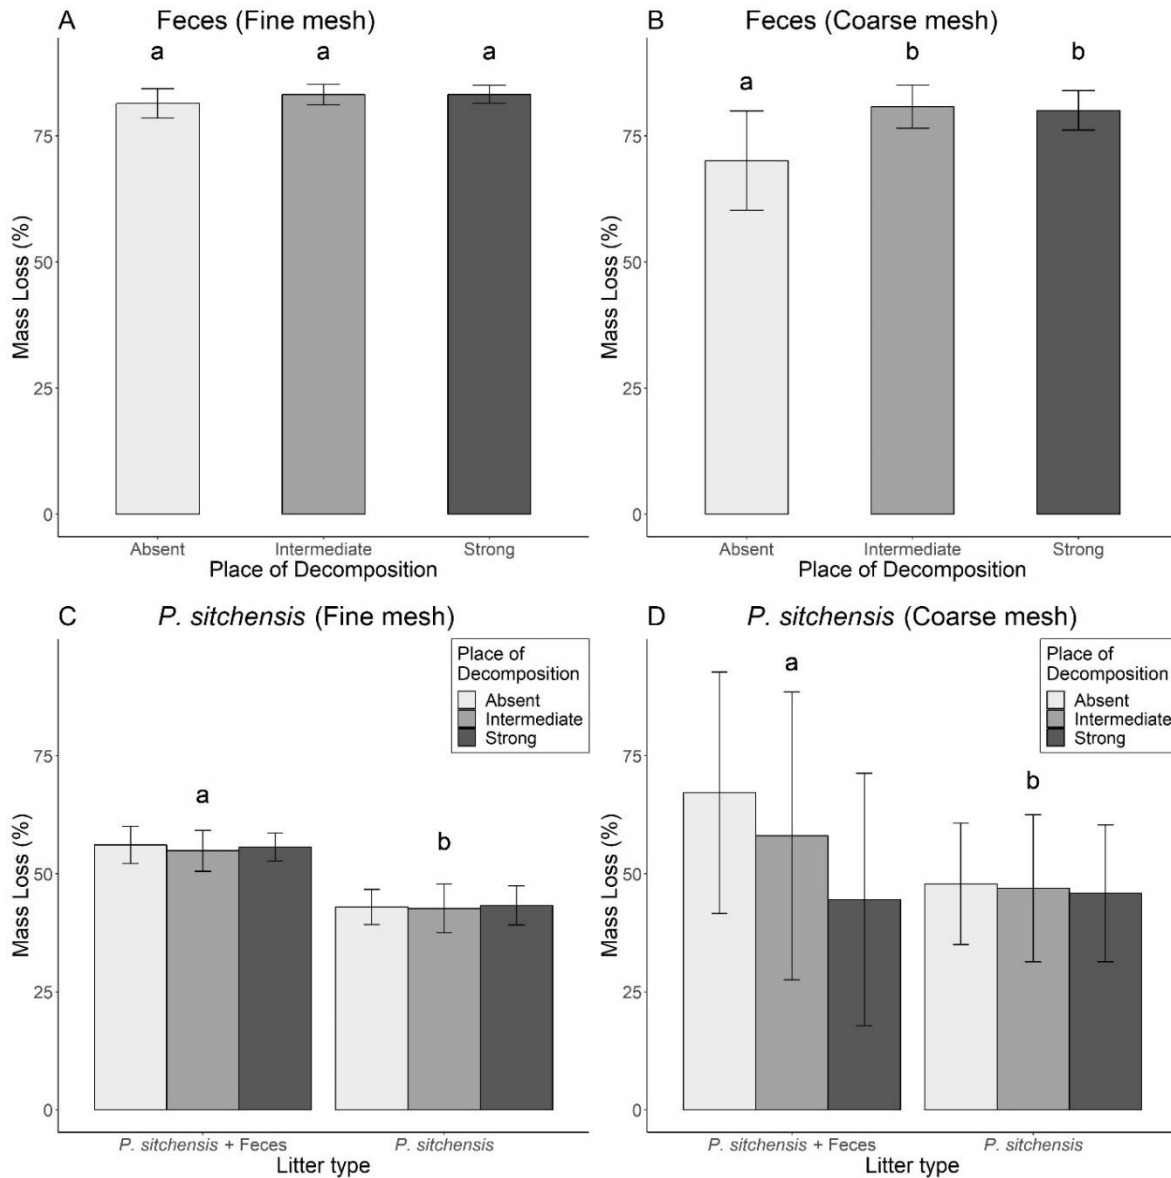

701

702 **Figure S3.** Decomposition of feces (top) and effect of feces addition on *Picea sitchensis* decomposition  
 703 (bottom) for fine mesh (left) and large mesh (right) litterbags. Shades of barplots represent the  
 704 herbivory category of the place of decomposition with: light grey = no browsing (no deer), grey =  
 705 intermediate (deer present for over 80 years but exposed to significant culls between 1997 and 2010)  
 706 and dark grey = strong herbivory treatment (deer present for over 80 years but not exposed to  
 707 hunting). Panel A – Mass loss in feces in fine mesh litter bags; Panel B – Mass loss in feces in coarse  
 708 mesh litter bags; Panel C – Mass loss in *P. sitchensis* litter with and without the addition of feces in fine  
 709 mesh litter bags; Panel D – Mass loss in *P. sitchensis* litter with and without the addition of feces in  
 710 coarse mesh litter bags.
